# Supplementary material for: Risk factors for carotid plaque progression after optimising the risk factor treatment: substudy results of the Atherosclerotic Plaque Characteristics Associated with a Progression Rate of the Plaque and a Risk of Stroke in Patients with the carotid Bifurcation Plaque Study (ANTIQUE)
Source: HighWire-hosted journal article supplement (doi:10.1136/svn-2021-001068), 2021-12-01
Supplement: svn-2021-001068supp001_data_supplement.pdf [file svn-2021-001068supp001_data_supplement.pdf]

**Table S1.** Medication in patients included to the analysis

|                                                            | <b>Patients<br/>included to the<br/>analysis<br/>(n=587)</b> | <b>Patients with<br/>stable plaques<br/>(n=332)</b> | <b>Patients with<br/>progressive<br/>plaques (n=255)</b> |
|------------------------------------------------------------|--------------------------------------------------------------|-----------------------------------------------------|----------------------------------------------------------|
| <b>Antihypertensives; n (%)</b>                            | 458 (78.0)                                                   | 251 (75.6)                                          | 207 (81.2)                                               |
| <b>Beta-blockers; n (%)</b>                                | 287 (48.9)                                                   | 139 (41.9)                                          | 148 (58.0)                                               |
| <b>Calcium channel blockers; n (%)</b>                     | 191 (32.5)                                                   | 117 (35.2)                                          | 74 (29.0)                                                |
| <b>Angiotensin-converting enzyme<br/>inhibitors; n (%)</b> | 114 (19.4)                                                   | 57 (17.2)                                           | 65 (25.5)                                                |
| <b>Angiotensin-II-receptor<br/>antagonists; n (%)</b>      | 162 (27.6)                                                   | 76 (22.9)                                           | 80 (31.4)                                                |
| <b>Diuretics; n (%)</b>                                    | 229 (39.0)                                                   | 120 (36.1)                                          | 109 (42.7)                                               |
| <b>Other; n (%)</b>                                        | 28 (4.8)                                                     | 13 (3.9)                                            | 15 (5.9)                                                 |
| <b>Peroral antidiabetics; n (%)</b>                        | 85 (14.5)                                                    | 45 (13.6)                                           | 40 (15.7)                                                |
| <b>Insulin; n (%)</b>                                      | 43 (7.3)                                                     | 31 (9.3)                                            | 12 (4.7)                                                 |
| <b>Statins; n (%)</b>                                      | 325 (55.4)                                                   | 176 (53.0)                                          | 149 (58.4)                                               |
| <b>Fibrate; n (%)</b>                                      | 6 (1.0)                                                      | 2 (0.6)                                             | 4 (1.6)                                                  |
| <b>Ezetimibe; n (%)</b>                                    | 21 (3.6)                                                     | 6 (1.8)                                             | 15 (5.9)                                                 |
| <b>Antiplatelet drugs; n (%)</b>                           | 214 (36.5)                                                   | 97 (29.2)                                           | 117 (45.9)                                               |
| <b>Anticoagulants; n (%)</b>                               | 64 (10.9)                                                    | 37 (11.1)                                           | 27 (10.6)                                                |

**Table 2.** Univariate logistic regression analyses for carotid plaque progression stratified for males and females

|                                                      | Male sex |             |         | Female sex |             |         |
|------------------------------------------------------|----------|-------------|---------|------------|-------------|---------|
|                                                      | OR       | 95% CI      | P value | OR         | 95% CI      | P value |
| <b>Age (per 1 year)</b>                              | 1.032    | 1.006–1.058 | 0.016   | 1.043      | 1.014–1.073 | 0.003   |
| <b>Weight (per 1 kg)</b>                             | 0.982    | 0.963–1.002 | 0.076   | 0.992      | 0.975–1.008 | 0.318   |
| <b>Height (per 1 cm)</b>                             | 0.994    | 0.960–1.029 | 0.733   | 0.985      | 0.951–1.020 | 0.396   |
| <b>Body mass index (per 1 unit)</b>                  | 0.926    | 0.858–0.999 | 0.048   | 0.982      | 0.938–1.029 | 0.444   |
| <b>Systolic blood pressure (per 1 mmHg)</b>          | 1.002    | 0.980–1.024 | 0.855   | 1.008      | 0.992–1.025 | 0.340   |
| <b>Diastolic blood pressure (per 1 mmHg)</b>         | 0.990    | 0.961–1.020 | 0.528   | 1.003      | 0.980–1.027 | 0.797   |
| <b>Plaque thickness on the left side (per 1 mm)</b>  | 1.481    | 1.148–1.911 | 0.003   | 2.010      | 1.512–2.671 | <0.0001 |
| <b>Plaque thickness on the right side (per 1 mm)</b> | 1.160    | 0.913–1.474 | 0.226   | 1.971      | 1.511–2.571 | <0.0001 |
| <b>Arterial hypertension</b>                         | 1.293    | 0.697–2.397 | 0.415   | 1.432      | 0.837–2.449 | 0.190   |
| <b>Diabetes mellitus</b>                             | 0.713    | 0.391–1.303 | 0.713   | 1.163      | 0.654–2.069 | 0.607   |
| <b>Hyperlipidemia</b>                                | 1.154    | 0.702–1.897 | 0.572   | 1.480      | 0.943–2.323 | 0.088   |
| <b>Coronary heart disease</b>                        | 1.189    | 0.697–2.028 | 0.524   | 2.022      | 1.147–3.566 | 0.015   |
| <b>Atrial fibrillation</b>                           | 1.344    | 0.623–2.898 | 0.451   | 0.788      | 0.343–1.810 | 0.574   |
| <b>History of myocardial infarction</b>              | 0.991    | 0.452–2.175 | 0.982   | 2.169      | 0.953–4.938 | 0.065   |
| <b>History of stroke</b>                             | 1.134    | 0.628–2.049 | 0.676   | 1.549      | 0.865–2.774 | 0.141   |
| <b>History of vascular surgery/stenting</b>          | 1.661    | 0.905–      | 0.102   | 3.107      | 1.569–6.153 | 0.001   |

|                            |       |               |       |       |                |       |  |
|----------------------------|-------|---------------|-------|-------|----------------|-------|--|
|                            |       |               | 3.051 |       |                |       |  |
| <b>Smoking</b>             | 1.521 | 0.761 – 3.041 | 0.235 | 2.173 | 1.099 – 4.297  | 0.026 |  |
| <b>Alcohol consumption</b> |       |               | 0.853 |       |                | 0.531 |  |
| <b>0 vs 1 IU/day</b>       | 1.005 | 0.512 – 1.973 | 0.988 | 0.878 | 0.563 – 1.370  | 0.567 |  |
| <b>0 vs ≥2 IU/day</b>      | 0.869 | 0.461 – 1.639 | 0.664 | 2.294 | 0.374 – 14.090 | 0.370 |  |

CI – confidential interval; IU – international unit; OR – odds ratio
